# Supplementary material for: ATD: a comprehensive bioinformatics resource for deciphering the association of autophagy and diseases
Source: Database (Oxford). 2018 Sep 18;2018:bay093. doi: 10.1093/database/bay093 (PMC6146119; doi:10.1093/database/bay093)
Supplement: Supplementary Data [file bay093_supp.xls]

## Sheet: Sheet1
genename	lable100000
ADCK5	1
ADM5	1
AHSP	1
ALDH5A1	1
APOBEC3D	1
APOL4	1
ASGR1	1
BC024306	1
BC034802	1
BC077729	1
BC127823	1
C19orf35	1
C22orf15	1
C8orf86	1
CATSPER4	1
CEBPA-AS1	1
COL5A1	1
CORO1A	1
CUEDC1	1
DKFZp686N1150	1
EYA2	1
FAM129C	1
FOXB1	1
GLOD5	1
GPR160	1
GREB1	1
HAGHL	1
ICAM1	1
IFNGR2	1
LDHD	1
LEPREL4	1
LINC00094	1
LOC100287177	1
LOC100507003	1
LOC149373	1
LPIN2	1
LSM4	1
MATN1-AS1	1
MIR3529	1
MIR4311	1
MIR4429	1
MIR4715	1
MYL10	1
NBPF12	1
NFATC2	1
PRKACA	1
PROM2	1
PTAFR	1
RNASE6	1
RNF219-AS1	1
SEC63	1
SLC17A6	1
SP5	1
TCL1B	1
TMEM170B	1
TMEM184B	1
TRIM38	1
TRIM72	1
TSPAN18	1
UBE2G2	1
WDR86	1
WNT10B	1
ZNF354B	1
ZNF491	1
ZNF814	1
C9orf106	0.99999
AK298119	0.99998
IWS1	0.99997
abParts	0.99996
ADAMTSL1	0.99996
AK023507	0.99996
AK091593	0.99996
AKT1	0.99996
AL832737	0.99996
ANO9	0.99996
APOBEC3F	0.99996
APOBEC3G	0.99996
ARHGAP39	0.99996
ARHGEF10	0.99996
ARPC1B	0.99996
AX747401	0.99996
AX747798	0.99996
AY769439	0.99996
BC040735	0.99996
BC041484	0.99996
BC043570	0.99996
BC073932	0.99996
C19orf33	0.99996
C19orf45	0.99996
C19orf81	0.99996
C2orf73	0.99996
C8G	0.99996
C8orf31	0.99996
C9orf47	0.99996
CCDC28B	0.99996
CD248	0.99996
COL18A1	0.99996
COX6B2	0.99996
CPEB2	0.99996
CR627148	0.99996
CRB2	0.99996
CXorf40A	0.99996
DIAPH1	0.99996
DQ590318	0.99996
DTNB	0.99996
DUSP28	0.99996
EIF6	0.99996
EMP3	0.99996
ESPN	0.99996
FCHO1	0.99996
FOXJ1	0.99996
FXR2	0.99996
GAS2L1	0.99996
HSPB7	0.99996
IFITM2	0.99996
IRF2BP1	0.99996
IZUMO4	0.99996
JAZF1-AS1	0.99996
KCNAB1	0.99996
KCNN1	0.99996
KLF1	0.99996
KLF13	0.99996
KREMEN2	0.99996
LINC00599	0.99996
LOC283177	0.99996
LOC338963	0.99996
LOC401164	0.99996
LOC642852	0.99996
LOC728613	0.99996
LPCAT2	0.99996
LRRTM3	0.99996
LYPD6B	0.99996
METTL7A	0.99996
Mir_1302	0.99996
Mir_720	0.99996
MIR4726	0.99996
MIR9-2	0.99996
MX2	0.99996
NEDD8	0.99996
NPAS1	0.99996
NRARP	0.99996
PLEKHA4	0.99996
PPFIBP2	0.99996
PPP1R14A	0.99996
RAB11FIP3	0.99996
RAB33A	0.99996
RSPH9	0.99996
RTBDN	0.99996
RUNDC3A	0.99996
RUSC1-AS1	0.99996
SEMA4A	0.99996
SERPINA3	0.99996
SLC37A1	0.99996
SOX10	0.99996
SREBF1	0.99996
SREBP-1	0.99996
SYT5	0.99996
TLR3	0.99996
TNFAIP8L1	0.99996
TRIM54	0.99996
VWA5B1	0.99996
WDR66	0.99996
WFIKKN1	0.99996
ZFPM1	0.99996
ZNRF1	0.99996
Mir_584	0.99995
ABHD17C	0.99994
ACOT4	0.99994
ADCY4	0.99994
AGPAT6	0.99994
AK055694	0.99994
AK055957	0.99994
AK094480	0.99994
AK097836	0.99994
AK125858	0.99994
AK309717	0.99994
AK310094	0.99994
ALOX12B	0.99994
ALOX5	0.99994
ANGPTL4	0.99994
ANKRD19P	0.99994
ANKRD33B	0.99994
ANKRD36	0.99994
ANXA3	0.99994
AOX1	0.99994
APC2	0.99994
APCDD1L-AS1	0.99994
APOPT1	0.99994
ARG2	0.99994
ARL13B	0.99994
ARMCX1	0.99994
ASPG	0.99994
ATP12A	0.99994
AX746654	0.99994
AX747413	0.99994
AZGP1P1	0.99994
BC039551	0.99994
BC040637	0.99994
BCL2L11	0.99994
BHLHE40	0.99994
C16orf98	0.99994
C3orf14	0.99994
C3orf80	0.99994
C4orf19	0.99994
C6orf223	0.99994
CARKD	0.99994
CCDC113	0.99994
CCDC37	0.99994
CCK	0.99994
CDC42EP1	0.99994
CDC42EP2	0.99994
CDH4	0.99994
CDK2AP2	0.99994
CDKN3	0.99994
CDYL	0.99994
CES2	0.99994
CH25H	0.99994
CHMP4B	0.99994
CHST13	0.99994
CLIC6	0.99994
COL18A1-AS2	0.99994
D43770	0.99994
DDX25	0.99994
DGKE	0.99994
DL491467	0.99994
DNAI2	0.99994
DQ590492	0.99994
DQ601842	0.99994
DSCC1	0.99994
DTD1	0.99994
DUSP23	0.99994
DUX2	0.99994
DYSF	0.99994
EP400	0.99994
EPHA6	0.99994
FAM154B	0.99994
FAM159A	0.99994
FAM174A	0.99994
FAM185A	0.99994
FAM199X	0.99994
FAM229A	0.99994
FAM73A	0.99994
FAM91A1	0.99994
FLJ26850	0.99994
FLJ44511	0.99994
FLJ46906	0.99994
FLNC	0.99994
FLVCR2	0.99994
FMNL1	0.99994
FOXI2	0.99994
GABRA5	0.99994
GAL	0.99994
GFER	0.99994
GP5	0.99994
GPR137C	0.99994
GPR39	0.99994
GPR88	0.99994
GPR89B	0.99994
HCRTR1	0.99994
HFE2	0.99994
HIC2	0.99994
HIST1H2BB	0.99994
HIST1H3C	0.99994
HIST2H2BF	0.99994
HLA-DPB1	0.99994
HOXC4	0.99994
HSPB8	0.99994
IFIT1	0.99994
IL17RC	0.99994
IL6R	0.99994
ING5	0.99994
INHBB	0.99994
INPP5A	0.99994
IQCH	0.99994
IQGAP2	0.99994
ISL1	0.99994
JAM2	0.99994
KAT8	0.99994
KBTBD11	0.99994
KCNF1	0.99994
KLF8	0.99994
KLHL24	0.99994
KLHL4	0.99994
KRT7	0.99994
LBX2	0.99994
LEKR1	0.99994
LINC00664	0.99994
LINC00857	0.99994
LINC00908	0.99994
LINC00925	0.99994
LOC100129175	0.99994
LOC100134229	0.99994
LOC100134868	0.99994
LOC153684	0.99994
LOC254099	0.99994
LOC339529	0.99994
LOC389705	0.99994
LONP2	0.99994
LRRC61	0.99994
LRRC71	0.99994
MAFK	0.99994
MAGIX	0.99994
MESP2	0.99994
MFSD2B	0.99994
MGAT5B	0.99994
MICALL1	0.99994
MIR1244-2	0.99994
MIR3621	0.99994
MIR4734	0.99994
MIR4740	0.99994
MIR658	0.99994
MPV17L2	0.99994
MT1IP	0.99994
MT1M	0.99994
MTE	0.99994
MVB12A	0.99994
NAB1	0.99994
NADSYN1	0.99994
NBPF3	0.99994
NEFH	0.99994
NEIL1	0.99994
NHS	0.99994
NLRP1	0.99994
OPA3	0.99994
OTUD3	0.99994
OXSM	0.99994
P2RX6	0.99994
PAPL	0.99994
PARP15	0.99994
PCDHA9	0.99994
PCDHGC3	0.99994
PEG10	0.99994
PGM2	0.99994
PLEKHD1	0.99994
PLEKHF1	0.99994
PNMT	0.99994
PPIF	0.99994
PRDM2	0.99994
PRPH	0.99994
PRR5	0.99994
PTGDR	0.99994
PTGS1	0.99994
PYCARD	0.99994
RAB11FIP4	0.99994
RAB12	0.99994
RAB32	0.99994
RAB42	0.99994
RASSF10	0.99994
RMND5A	0.99994
RPL17	0.99994
RYR3	0.99994
SAT1	0.99994
SBDSP1	0.99994
SCRT1	0.99994
SEMA4G	0.99994
SERP2	0.99994
SERPINE1	0.99994
SH2D4A	0.99994
SH3GL2	0.99994
SH3GL3	0.99994
SLC16A2	0.99994
SLC22A5	0.99994
SLC25A33	0.99994
SLC38A3	0.99994
SLC52A3	0.99994
SLCO4A1	0.99994
SMIM10	0.99994
SNX7	0.99994
SPAG6	0.99994
SPATA18	0.99994
SPTBN2	0.99994
SRGAP1	0.99994
ST8SIA3	0.99994
STAC2	0.99994
STBD1	0.99994
STMN2	0.99994
STOX2	0.99994
STX4	0.99994
SYNGR1	0.99994
SYT17	0.99994
TAGLN3	0.99994
TCP1	0.99994
TCRA	0.99994
TEX264	0.99994
TGFBR2	0.99994
TJAP1	0.99994
TMPRSS3	0.99994
TNNC2	0.99994
TOM1	0.99994
TP53INP2	0.99994
TRMU	0.99994
TTLL3	0.99994
TXLNG2P	0.99994
UAP1L1	0.99994
UBE2A	0.99994
UBE3C	0.99994
USP14	0.99994
USP27X	0.99994
WDR38	0.99994
WDR44	0.99994
YIF1B	0.99994
YKT6	0.99994
ZNF136	0.99994
ZNF174	0.99994
ZNF440	0.99994
ZNF454	0.99994
ZNF488	0.99994
ZNF528	0.99994
ZNF880	0.99994
ZSWIM4	0.99994
AB209621	0.99993
ADAM33	0.99993
ADAMTSL3	0.99993
ADRA1D	0.99993
ADRA2A	0.99993
AFAP1L1	0.99993
AIFM3	0.99993
AK055408	0.99993
AKR1E2	0.99993
ALOX12	0.99993
APBB1IP	0.99993
APOC1P1	0.99993
ASCL2	0.99993
ATHL1	0.99993
B3GNT3	0.99993
B3GNT6	0.99993
BC005927	0.99993
BC016656	0.99993
BC040189	0.99993
BC070228	0.99993
BC132944	0.99993
BC140723	0.99993
BDKRB2	0.99993
BIRC7	0.99993
BRSK1	0.99993
C10orf53	0.99993
C1orf95	0.99993
CA4	0.99993
CACNA1B	0.99993
CACNG4	0.99993
CALB2	0.99993
CALY	0.99993
CARNS1	0.99993
CCDC105	0.99993
CCDC108	0.99993
CCDC42B	0.99993
CCDC67	0.99993
CCDC81	0.99993
CCNA1	0.99993
CDH13	0.99993
CDKN2B-AS1	0.99993
CDX4	0.99993
CHP2	0.99993
CLEC2L	0.99993
CLEC4GP1	0.99993
CMYA5	0.99993
CNIH2	0.99993
COMT	0.99993
CORO6	0.99993
CPQ	0.99993
CPZ	0.99993
CRIP1	0.99993
CSDC2	0.99993
CTHRC1	0.99993
CX3CL1	0.99993
DBX1	0.99993
DL490658	0.99993
DNAH6	0.99993
DPY19L2P4	0.99993
DRD4	0.99993
EDN3	0.99993
EFNA2	0.99993
EFTUD1P1	0.99993
EMX1	0.99993
EN1	0.99993
FAM110D	0.99993
FAM215A	0.99993
FAM21C	0.99993
FAM222A	0.99993
FAM86B3P	0.99993
FAM98C	0.99993
FGFRL1	0.99993
GAD2	0.99993
GLT1D1	0.99993
GPD1L	0.99993
GREM2	0.99993
GRINA	0.99993
HCK	0.99993
HES6	0.99993
HHIPL1	0.99993
HORMAD2	0.99993
HSPA12B	0.99993
HSPB9	0.99993
HTR6	0.99993
IL13RA1	0.99993
ISLR2	0.99993
KCNIP1	0.99993
KCNK15	0.99993
KCTD17	0.99993
KLF2	0.99993
LAMC3	0.99993
LDLRAD4	0.99993
LGALS7	0.99993
LINC00954	0.99993
LOC100130539	0.99993
LOC100287010	0.99993
LOC100506394	0.99993
LOC399815	0.99993
LOC402160	0.99993
LOC442497	0.99993
LOC645166	0.99993
LOC646862	0.99993
LPIN3	0.99993
LRRC10B	0.99993
LRRC26	0.99993
LY6E	0.99993
MAFA	0.99993
MCF2L2	0.99993
MEDAG	0.99993
MFI2-AS1	0.99993
MFSD7	0.99993
MIR184	0.99993
MIR3197	0.99993
MIR34B	0.99993
MIR34C	0.99993
MIR3663	0.99993
MIR4277	0.99993
MIR4488	0.99993
MIR4505	0.99993
MIR4692	0.99993
MIR596	0.99993
MIR9-1	0.99993
MLPH	0.99993
MPZL2	0.99993
MT1A	0.99993
MYO1G	0.99993
NELL1	0.99993
NKX6-3	0.99993
NOL3	0.99993
NPBWR1	0.99993
NPEPL1	0.99993
NPPC	0.99993
NRN1L	0.99993
NTN3	0.99993
NXPH4	0.99993
OAS3	0.99993
ODZ4	0.99993
OLIG3	0.99993
OPRD1	0.99993
OVOL1	0.99993
P2RY6	0.99993
PANX2	0.99993
PAQR5	0.99993
PCDHB11	0.99993
PHACTR3	0.99993
PHLDA2	0.99993
PKP3	0.99993
PNMAL2	0.99993
POU2F3	0.99993
PPP1R3G	0.99993
PRKAG2-AS1	0.99993
PRR5-ARHGAP8	0.99993
RAB36	0.99993
RAB6C	0.99993
RBP7	0.99993
RGL3	0.99993
RHOU	0.99993
RNF157-AS1	0.99993
RPL23AP82	0.99993
S1PR5	0.99993
SERHL	0.99993
SGMS2	0.99993
SLC11A1	0.99993
SLC22A3	0.99993
SLC39A4	0.99993
SLC51A	0.99993
SNX20	0.99993
SPEF1	0.99993
STAB1	0.99993
STIL	0.99993
STMND1	0.99993
SV2C	0.99993
SYPL2	0.99993
SYT12	0.99993
TAP1	0.99993
TBC1D24	0.99993
TDH	0.99993
THEM6	0.99993
TIMM44	0.99993
TUBBP5	0.99993
TVP23C	0.99993
UBXN10	0.99993
UTF1	0.99993
VAX2	0.99993
VENTX	0.99993
WDR60	0.99993
WT1-AS	0.99993
WWC3	0.99993
XK	0.99993
ZDHHC1	0.99993
ZFP3	0.99993
ZNF439	0.99993
ZNF653	0.99993
ZNF703	0.99993
AK095700	0.99991
LOC283335	0.99991
A2ML1	0.9999
AADACL3	0.9999
AB231703	0.9999
AK022382	0.9999
AK098067	0.9999
AK124484	0.9999
AK124682	0.9999
AK124806	0.9999
AK9	0.9999
AKNAD1	0.9999
APOBEC3B	0.9999
APOBEC3C	0.9999
AX747192	0.9999
AX748125	0.9999
BC027906	0.9999
BC028746	0.9999
BC030750	0.9999
BC034913	0.9999
BC038245	0.9999
BC039094	0.9999
BC040700	0.9999
BC045767	0.9999
BC070247	0.9999
BC148242	0.9999
BMF	0.9999
C19orf57	0.9999
C6orf1	0.9999
CACNG2	0.9999
CC2D1B	0.9999
CECR3	0.9999
CHST15	0.9999
DKFZp434A128	0.9999
DOK4	0.9999
EGF	0.9999
ENOX1	0.9999
FAM107A	0.9999
FAM177B	0.9999
FAM71E1	0.9999
FGD4	0.9999
FLJ16124	0.9999
FOXN3-AS2	0.9999
FRMD4B	0.9999
GHRH	0.9999
GPR179	0.9999
IFITM10	0.9999
KCNRG	0.9999
KLHDC7A	0.9999
KLHL6	0.9999
LINC00029	0.9999
LOC100130880	0.9999
LOC151171	0.9999
LOC400620	0.9999
LOC654342	0.9999
LRRC17	0.9999
LRRC2-AS1	0.9999
Mir_684	0.9999
mir-108-1	0.9999
MIR146A	0.9999
MIR320B2	0.9999
MIR365A	0.9999
MIR512-2	0.9999
MN1	0.9999
MROH5	0.9999
NES	0.9999
NLRP12	0.9999
NUMB	0.9999
OR4D5	0.9999
P2RX1	0.9999
PCBP1-AS1	0.9999
PPBP	0.9999
PPM1F	0.9999
PRSS36	0.9999
RAB35	0.9999
RAPGEF3	0.9999
SEC31B	0.9999
SLC25A1	0.9999
SLC25A18	0.9999
SMAD5	0.9999
SNX5	0.9999
SUSD1	0.9999
SYT6	0.9999
TMEM213	0.9999
TMEM88B	0.9999
TNRC18P1	0.9999
UBE2O	0.9999
UCN2	0.9999
WBSCR27	0.9999
ZBED6CL	0.9999
AK098705	0.99989
BC048130	0.99989
BX648961	0.99989
C15orf57	0.99989
CCDC8	0.99989
CD180	0.99989
CEACAM21	0.99989
LGI2	0.99989
LRRTM2	0.99989
MIR4256	0.99989
Nup88	0.99989
OVOL3	0.99989
RAD52	0.99989
RPL22	0.99989
SALL2	0.99989
SNORD99	0.99989
SPP1	0.99989
TCIRG1	0.99989
AK021888	0.99988
ARL3	0.99988
BC034795	0.99988
BC073807	0.99988
CHD4	0.99988
CLCN4	0.99988
IQGAP3	0.99988
LEMD1-AS1	0.99988
LOC283683	0.99988
MFRP	0.99988
PHLPP2	0.99988
RFX4	0.99988
SETD3	0.99988
SNORA62	0.99988
SPDYA	0.99988
SRD5A3-AS1	0.99988
TAMM41	0.99988
TOM1L2	0.99988
TUSC1	0.99988
HPS1	0.99987
E2F1	0.99984
FBXL6	0.99984
SLC25A41	0.99984
ZNF362	0.99984
ACTG1	0.99983
ADARB1	0.99983
AK023304	0.99983
ALDH1L1-AS2	0.99983
AX721123	0.99983
BC082979	0.99983
C19orf52	0.99983
CATSPERG	0.99983
CNPY2	0.99983
CRLS1	0.99983
CXorf40B	0.99983
DD182001	0.99983
DEXI	0.99983
DQ570720	0.99983
DQ601906	0.99983
EIF1AY	0.99983
FAM127B	0.99983
GTF2H2C	0.99983
HSD17B7	0.99983
LINC00152	0.99983
LINC00240	0.99983
LOC439994	0.99983
LOC541467	0.99983
OXLD1	0.99983
PFN1	0.99983
PIM2	0.99983
RBM11	0.99983
REC8	0.99983
RFESD	0.99983
RGS9BP	0.99983
RPL12	0.99983
RPL8	0.99983
RPS2	0.99983
RRAGB	0.99983
SCAI	0.99983
SLC31A2	0.99983
SNORA44	0.99983
SNORA51	0.99983
SNORA61	0.99983
SNORA64	0.99983
SNORA65	0.99983
SNORA70	0.99983
SNORD17	0.99983
SNORD22	0.99983
SNORD29	0.99983
SNORD30	0.99983
SNORD31	0.99983
SNORD36A	0.99983
SNORD36B	0.99983
SNORD96A	0.99983
SOCS3	0.99983
SUV39H1	0.99983
TES	0.99983
TMEM143	0.99983
TRO	0.99983
TSPYL4	0.99983
UNC5B	0.99983
UPRT	0.99983
UROD	0.99983
VIM	0.99983
VPS13D	0.99983
WHAMM	0.99983
X15673	0.99983
ZNF233	0.99983
PCDHB1	0.99982
QARS	0.99982
BCL6B	0.99981
CXCR7	0.9998
IL23A	0.99979
LOC284648	0.99977
C17orf107	0.99975
ENGASE	0.99974
MIR7-2	0.99974
UBXN11	0.99974
BC007940	0.99973
GPR19	0.99973
AK130110	0.99972
BC065231	0.99972
DQ577440	0.99972
RNPS1	0.99972
HSPB1	0.9997
LINC00674	0.99969
LOC100527964	0.99969
ARMC8	0.99968
C12orf44	0.99968
CFLAR	0.99968
GABPB2	0.99968
LAMTOR4	0.99968
LARP4	0.99968
LRRC9	0.99968
PAK1IP1	0.99968
RAD9A	0.99968
RPL21	0.99968
SCARNA17	0.99968
TFAM	0.99968
ZNF135	0.99968
ZNF549	0.99968
ZNF876P	0.99968
ABT1	0.99967
AK092080	0.99967
AK310237	0.99967
ARC	0.99967
ARIH1	0.99967
ATF1	0.99967
ATG4A	0.99967
AX747641	0.99967
BABAM1	0.99967
BC039399	0.99967
BC041327	0.99967
BC070363	0.99967
BCL2L12	0.99967
BLM	0.99967
BLOC1S3	0.99967
BTRC	0.99967
BX538249	0.99967
C10orf32	0.99967
C10orf95	0.99967
C16orf62	0.99967
C20orf24	0.99967
C2orf74	0.99967
C9orf43	0.99967
CALR	0.99967
CALU	0.99967
CENPW	0.99967
CHCHD5	0.99967
CHST4	0.99967
CISD1	0.99967
CLTC	0.99967
CRYZL1	0.99967
CTSA	0.99967
CYB5B	0.99967
DARS2	0.99967
DCST2	0.99967
DESI2	0.99967
DMXL1	0.99967
DNAJB5	0.99967
DNAL1	0.99967
DNM1	0.99967
DUSP15	0.99967
EFNB3	0.99967
EXOSC4	0.99967
FAM117B	0.99967
FAM151B	0.99967
FAM207A	0.99967
FAM98B	0.99967
FBLIM1	0.99967
FBXO45	0.99967
FKRP	0.99967
FRAT2	0.99967
FUBP3	0.99967
FUT2	0.99967
GINS1	0.99967
GMPS	0.99967
GNL3	0.99967
HIST1H1D	0.99967
HIST1H2BD	0.99967
HP08874	0.99967
HP11097	0.99967
HTATSF1	0.99967
HTR2C	0.99967
ISG15	0.99967
JA668106	0.99967
JUND	0.99967
KCP	0.99967
KLHL23	0.99967
LAMC2	0.99967
LANCL2	0.99967
LDLRAD3	0.99967
LIN52	0.99967
LNPEP	0.99967
LOC100130155	0.99967
LOC100289092	0.99967
LOC101410533	0.99967
MARCH6	0.99967
METTL21B	0.99967
MGC39545	0.99967
MIR1181	0.99967
MIR1469	0.99967
MIR3650	0.99967
MMP11	0.99967
MRPL52	0.99967
MRPS36	0.99967
MSH6	0.99967
MST4	0.99967
MUC3B	0.99967
MYH7B	0.99967
NAA60	0.99967
NDUFB5	0.99967
NLRC5	0.99967
NOLC1	0.99967
NONO	0.99967
NPCEDRG	0.99967
NXNL2	0.99967
PAIP2	0.99967
PARD6A	0.99967
PHYHD1	0.99967
PINLYP	0.99967
PLEKHO2	0.99967
POLR2G	0.99967
POMP	0.99967
POP4	0.99967
PPM1N	0.99967
PQLC3	0.99967
PRMT2	0.99967
PSMC2	0.99967
PTDSS2	0.99967
RALA	0.99967
RPL13A	0.99967
RPL35A	0.99967
RUVBL2	0.99967
SASH1	0.99967
SCAND1	0.99967
SEC22B	0.99967
SEH1L	0.99967
SELV	0.99967
SEPT2	0.99967
SLC25A36	0.99967
SLC35E2B	0.99967
SMARCA4	0.99967
SMARCAD1	0.99967
SNORD24	0.99967
SNORD42B	0.99967
SNRPA	0.99967
SOCS4	0.99967
SPRYD4	0.99967
SRP9	0.99967
SSB	0.99967
SSNA1	0.99967
STX12	0.99967
TEX2	0.99967
TMED2	0.99967
TMEM222	0.99967
TMEM9B-AS1	0.99967
TMX2	0.99967
TRPM4	0.99967
UBR7	0.99967
UCHL1	0.99967
UHMK1	0.99967
USP10	0.99967
UVSSA	0.99967
VBP1	0.99967
VDAC3	0.99967
WDR55	0.99967
WWTR1-AS1	0.99967
YY1	0.99967
ZDHHC13	0.99967
ZKSCAN5	0.99967
ZNF138	0.99967
ZNF271	0.99967
ZNF333	0.99967
ZNF542	0.99967
ZNF613	0.99967
ZNF627	0.99967
ZNHIT3	0.99967
AASDHPPT	0.99966
AB074162	0.99966
ABHD10	0.99966
ABHD2	0.99966
ABHD5	0.99966
ABHD8	0.99966
ACAT2	0.99966
ACSL3	0.99966
ACSS3	0.99966
ADIPOR2	0.99966
AGBL5	0.99966
AGGF1	0.99966
AGTRAP	0.99966
AK055623	0.99966
AK093264	0.99966
AK130486	0.99966
AK307150	0.99966
AK310239	0.99966
AK313893	0.99966
AKT1S1	0.99966
ALKBH5	0.99966
ANAPC4	0.99966
ANKRD42	0.99966
APPL1	0.99966
ARFGEF2	0.99966
ARMC6	0.99966
ARPC1A	0.99966
ARSK	0.99966
ASH2L	0.99966
ASPSCR1	0.99966
ATP5C1	0.99966
ATP5L	0.99966
ATP6V1C1	0.99966
ATRAID	0.99966
AXDND1	0.99966
B3GALTL	0.99966
B3GNT2	0.99966
BAG3	0.99966
BBS9	0.99966
BC017347	0.99966
BC029038	0.99966
BC032716	0.99966
BC035094	0.99966
BC069047	0.99966
BC071770	0.99966
BC079832	0.99966
BC128433	0.99966
BCAT2	0.99966
BCKDHA	0.99966
BCL2L1	0.99966
BLOC1S1	0.99966
BPHL	0.99966
BRCA2	0.99966
BRE	0.99966
BTN2A2	0.99966
C10orf10	0.99966
C10orf111	0.99966
C11orf58	0.99966
C12orf60	0.99966
C17orf53	0.99966
C18orf54	0.99966
C19orf55	0.99966
C19orf60	0.99966
C1orf106	0.99966
C1orf228	0.99966
C1orf94	0.99966
C5orf47	0.99966
C6orf203	0.99966
C6orf89	0.99966
C9orf85	0.99966
C9orf96	0.99966
CACNB3	0.99966
CADM2	0.99966
CAMLG	0.99966
CAPN7	0.99966
CASD1	0.99966
CBFB	0.99966
CCDC107	0.99966
CCDC132	0.99966
CCDC15	0.99966
CCDC157	0.99966
CCDC28A	0.99966
CCDC66	0.99966
CCDC86	0.99966
CCNB2	0.99966
CCNYL1	0.99966
CCP110	0.99966
CCR10	0.99966
CD55	0.99966
CDC6	0.99966
CDCA2	0.99966
CDK16	0.99966
CDK2	0.99966
CDR2L	0.99966
CEPT1	0.99966
CERS4	0.99966
CHAMP1	0.99966
CHD7	0.99966
CHIC1	0.99966
CHP1	0.99966
CHTOP	0.99966
CKMT2	0.99966
CLDN15	0.99966
CLSTN3	0.99966
CMPK1	0.99966
CNN1	0.99966
COMTD1	0.99966
COPG1	0.99966
CPT2	0.99966
CRADD	0.99966
CRCP	0.99966
CSE1L	0.99966
CUTA	0.99966
CYS1	0.99966
CYSTM1	0.99966
DBI	0.99966
DCAF15	0.99966
DCAF7	0.99966
DCUN1D4	0.99966
DDX1	0.99966
DDX20	0.99966
DDX27	0.99966
DDX3Y	0.99966
DDX42	0.99966
DENND3	0.99966
DERA	0.99966
DHRS4	0.99966
DHX8	0.99966
DL491750	0.99966
DMTF1	0.99966
DNAJB6	0.99966
DNAJC13	0.99966
DNAJC25	0.99966
DNAJC4	0.99966
DPH6-AS1	0.99966
DPY19L4	0.99966
DTNA	0.99966
DYRK1A	0.99966
EBAG9	0.99966
EEF1B2	0.99966
EEF2K	0.99966
EFCAB2	0.99966
EFCAB7	0.99966
EID3	0.99966
EIF1	0.99966
EIF1B	0.99966
EIF3F	0.99966
EIF4H	0.99966
EIF5A	0.99966
ELAC1	0.99966
ELP3	0.99966
EMC4	0.99966
EMD	0.99966
EME1	0.99966
ERAL1	0.99966
ERCC1	0.99966
ERGIC3	0.99966
ERLEC1	0.99966
ETFDH	0.99966
EXD2	0.99966
FAH	0.99966
FAM111A	0.99966
FAM171B	0.99966
FAM200B	0.99966
FAM216A	0.99966
FAM229B	0.99966
FAM47E	0.99966
FAM84B	0.99966
FBXO22	0.99966
FGGY	0.99966
FIP1L1	0.99966
FLVCR1	0.99966
FOXK2	0.99966
FRY	0.99966
G2E3	0.99966
GAP43	0.99966
GCC2	0.99966
GDF11	0.99966
GEMIN7	0.99966
GET4	0.99966
GLE1	0.99966
GLTSCR2	0.99966
GLUD1P3	0.99966
GMEB1	0.99966
GNG2	0.99966
GOLT1B	0.99966
GOSR1	0.99966
GOSR2	0.99966
GPHN	0.99966
GPX1	0.99966
GSG2	0.99966
GSTZ1	0.99966
GTSE1	0.99966
HAT1	0.99966
HAX1	0.99966
HDAC6	0.99966
HELB	0.99966
HEMK1	0.99966
HI650153	0.99966
HIGD2A	0.99966
HIST1H2AD	0.99966
HIST1H2AJ	0.99966
HIST1H2BG	0.99966
HIST1H2BO	0.99966
HIST1H3B	0.99966
HIST1H3D	0.99966
HIST1H3E	0.99966
HIST1H3G	0.99966
HIST1H3I	0.99966
HIST1H4A	0.99966
HIST1H4C	0.99966
HIST1H4H	0.99966
HIST1H4J	0.99966
HIST2H2AC	0.99966
HIST3H2BB	0.99966
HMBOX1	0.99966
HNMT	0.99966
HNRNPAB	0.99966
HP08716	0.99966
HRC	0.99966
HSDL2	0.99966
HTR7P1	0.99966
HYLS1	0.99966
ICT1	0.99966
ID4	0.99966
IMPACT	0.99966
INSIG2	0.99966
INTS5	0.99966
IPO7	0.99966
IRAK1BP1	0.99966
IREB2	0.99966
ITFG2	0.99966
ITGA3	0.99966
JA429801	0.99966
JA429830	0.99966
JA429831	0.99966
JB074932	0.99966
JB137814	0.99966
JMJD1C-AS1	0.99966
KAT5	0.99966
KCTD5	0.99966
KDM4C	0.99966
KDM5B-AS1	0.99966
KIAA1033	0.99966
KIAA1244	0.99966
KIAA1377	0.99966
KIAA1468	0.99966
KIAA1551	0.99966
KIAA1841	0.99966
KLHL18	0.99966
KPNA5	0.99966
KXD1	0.99966
LAMC1	0.99966
LAMTOR5-AS1	0.99966
LARP7	0.99966
LENG8	0.99966
LIAS	0.99966
LIG3	0.99966
LIMK1	0.99966
LINC00085	0.99966
LINC00235	0.99966
LINC00339	0.99966
LINC00568	0.99966
LIPE	0.99966
LIPE-AS1	0.99966
LIPG	0.99966
LMNB1	0.99966
LOC100128568	0.99966
LOC100130987	0.99966
LOC100133985	0.99966
LOC100289361	0.99966
LOC100506710	0.99966
LOC100506804	0.99966
LOC100652791	0.99966
LOC147093	0.99966
LOC148413	0.99966
LOC253039	0.99966
LOC284912	0.99966
LOC550643	0.99966
LOC644656	0.99966
LOC731223	0.99966
LRGUK	0.99966
LRRC8B	0.99966
LRWD1	0.99966
LTV1	0.99966
LUC7L2	0.99966
MAGED2	0.99966
MALT1	0.99966
MAN1A2	0.99966
MAP10	0.99966
MAP1S	0.99966
MAPK8	0.99966
MARCKS	0.99966
MARS	0.99966
MAU2	0.99966
MCPH1	0.99966
MED9	0.99966
MEIG1	0.99966
MEPCE	0.99966
METRNL	0.99966
METTL23	0.99966
METTL2A	0.99966
METTL9	0.99966
MFSD3	0.99966
MGA	0.99966
MID1IP1	0.99966
MIDN	0.99966
MIF	0.99966
MINOS1-NBL1	0.99966
MIP	0.99966
MIPOL1	0.99966
MIR1538	0.99966
MIR181A2HG	0.99966
MIR191	0.99966
MIR21	0.99966
MIR3188	0.99966
MIR3610	0.99966
MIR3648	0.99966
MIR3661	0.99966
MIR4461	0.99966
MIR4482-1	0.99966
MIR4674	0.99966
MIR5091	0.99966
MNAT1	0.99966
MPI	0.99966
MRP63	0.99966
MRPL22	0.99966
MRPL34	0.99966
MRPL41	0.99966
MRPL42	0.99966
MRPS7	0.99966
MSTO1	0.99966
MTHFD1L	0.99966
MTHFD2L	0.99966
MYD88	0.99966
MYL6B	0.99966
MYNN	0.99966
N4BP2	0.99966
NAA35	0.99966
NASP	0.99966
NDC80	0.99966
NDUFAF6	0.99966
NDUFS8	0.99966
NEU3	0.99966
NFX1	0.99966
NIP7	0.99966
NR1D2	0.99966
NSRP1	0.99966
NSUN4	0.99966
NUCB2	0.99966
NUDC	0.99966
NUDT16	0.99966
NUDT16P1	0.99966
NUDT2	0.99966
NUDT7	0.99966
NUSAP1	0.99966
NXT2	0.99966
ORAI1	0.99966
OS9	0.99966
OTUB1	0.99966
P2RX4	0.99966
P2RY1	0.99966
PAN3	0.99966
PANK2	0.99966
PANX1	0.99966
PAPD5	0.99966
PARP2	0.99966
PCNXL4	0.99966
PCOLCE	0.99966
PDE3A	0.99966
PDE3B	0.99966
PET117	0.99966
PFDN4	0.99966
PFDN5	0.99966
PGD	0.99966
PHGDH	0.99966
PHKG2	0.99966
PIGW	0.99966
PIK3C3	0.99966
PLK1S1	0.99966
PLXDC2	0.99966
PMAIP1	0.99966
PMF1	0.99966
PNO1	0.99966
POLD1	0.99966
POLD3	0.99966
POLR1B	0.99966
POM121	0.99966
PPME1	0.99966
PPP1R27	0.99966
PPP2R1A	0.99966
PPP2R3A	0.99966
PPP2R5D	0.99966
PPP6R2	0.99966
PRKAR1A	0.99966
PRPF4B	0.99966
PSENEN	0.99966
PSKH1	0.99966
PSMC4	0.99966
PSMD7	0.99966
PTCD2	0.99966
PTPN11	0.99966
PYROXD1	0.99966
RAB19	0.99966
RAB39A	0.99966
RAB3IP	0.99966
RABGAP1	0.99966
RAD54L	0.99966
RALGPS1	0.99966
RAP1B	0.99966
RASAL1	0.99966
RASIP1	0.99966
RBBP6	0.99966
RBL2	0.99966
RBM10	0.99966
RBM14-RBM4	0.99966
RBM27	0.99966
RBM48	0.99966
RIBC1	0.99966
RIC8A	0.99966
RLF	0.99966
RNASEH2B	0.99966
RNF169	0.99966
RNF2	0.99966
RNF8	0.99966
RNU6ATAC	0.99966
RPAIN	0.99966
RPIA	0.99966
RPL10A	0.99966
RPLP2	0.99966
RPN2	0.99966
RPS28	0.99966
RRAGA	0.99966
RTN2	0.99966
RUFY1	0.99966
RUSC2	0.99966
SAE1	0.99966
SART1	0.99966
SCAF8	0.99966
SCAMP1	0.99966
SCAMP4	0.99966
SCRN3	0.99966
SDCCAG8	0.99966
SDHC	0.99966
SEC11C	0.99966
SEC24A	0.99966
SEC24C	0.99966
SETD1A	0.99966
SETD8	0.99966
SETDB2	0.99966
SF3A2	0.99966
SF3B3	0.99966
SHC1	0.99966
SIVA1	0.99966
SLC25A26	0.99966
SLC26A2	0.99966
SLC39A1	0.99966
SLC44A4	0.99966
SLX4IP	0.99966
SMAP1	0.99966
SNAP29	0.99966
SNHG3	0.99966
SNORA21	0.99966
SNORA24	0.99966
SNORD26	0.99966
SNORD33	0.99966
SNORD46	0.99966
SNORD68	0.99966
SNRK	0.99966
SNRPD1	0.99966
SNRPF	0.99966
SNTB2	0.99966
SNURF	0.99966
SOX12	0.99966
SPAG4	0.99966
SPAG5-AS1	0.99966
SPATA5	0.99966
SPECC1L	0.99966
SPINT1	0.99966
SPNS1	0.99966
SRC	0.99966
SREK1	0.99966
SRSF6	0.99966
SS18L2	0.99966
STK16	0.99966
STK35	0.99966
STXBP3	0.99966
SUOX	0.99966
SYNGR4	0.99966
SZRD1	0.99966
TACO1	0.99966
TADA2A	0.99966
TARS	0.99966
TARS2	0.99966
TBC1D17	0.99966
TBC1D23	0.99966
TBK1	0.99966
TDGF1	0.99966
TDRD3	0.99966
TFG	0.99966
THAP11	0.99966
THAP2	0.99966
THAP6	0.99966
THAP9	0.99966
TIPARP	0.99966
TIPRL	0.99966
TMEM109	0.99966
TMEM14C	0.99966
TMEM256	0.99966
TMEM45A	0.99966
TMUB1	0.99966
TNFAIP8	0.99966
TOE1	0.99966
TOMM40	0.99966
TOMM5	0.99966
TONSL	0.99966
TOR4A	0.99966
TPGS1	0.99966
TPP2	0.99966
TRIM13	0.99966
TRIM22	0.99966
TRIM56	0.99966
TRMT11	0.99966
TRMT12	0.99966
TRMT13	0.99966
TRNA_Asp	0.99966
TRNA_Gln	0.99966
TRNT1	0.99966
TRPC1	0.99966
TRRAP	0.99966
TSPYL2	0.99966
TTC8	0.99966
TTK	0.99966
TUBG1	0.99966
TULP3	0.99966
UBE2I	0.99966
UBE2R2	0.99966
UBL7-AS1	0.99966
UFL1	0.99966
UGCG	0.99966
UGT8	0.99966
USP1	0.99966
USP25	0.99966
UTP14C	0.99966
VMAC	0.99966
VRTN	0.99966
VSIG10	0.99966
VTA1	0.99966
WDR18	0.99966
WDR25	0.99966
WDR48	0.99966
WDR75	0.99966
WDYHV1	0.99966
XPOT	0.99966
XRCC5	0.99966
YTHDC2	0.99966
ZBTB1	0.99966
ZBTB22	0.99966
ZC3H18	0.99966
ZDHHC17	0.99966
ZFP1	0.99966
ZFYVE16	0.99966
ZNF141	0.99966
ZNF263	0.99966
ZNF268	0.99966
ZNF326	0.99966
ZNF397	0.99966
ZNF429	0.99966
ZNF446	0.99966
ZNF460	0.99966
ZNF48	0.99966
ZNF512B	0.99966
ZNF517	0.99966
ZNF544	0.99966
ZNF547	0.99966
ZNF548	0.99966
ZNF620	0.99966
ZNF660	0.99966
ZNF678	0.99966
ZNF691	0.99966
ZNF701	0.99966
ZNF738	0.99966
ZNF845	0.99966
ZNF85	0.99966
ZNF92	0.99966
ZSCAN21	0.99966
AARS	0.99965
AATF	0.99965
ABCA7	0.99965
ABCC10	0.99965
ABHD17A	0.99965
ABL1	0.99965
ACAD9	0.99965
ACADM	0.99965
ACBD4	0.99965
ACCS	0.99965
ACER2	0.99965
ACIN1	0.99965
ACO2	0.99965
ACOT1	0.99965
ACOT13	0.99965
ACTR3	0.99965
ACTR6	0.99965
ACVR2B	0.99965
ADCK4	0.99965
ADK	0.99965
ADO	0.99965
ADPRM	0.99965
AEBP2	0.99965
AGPAT5	0.99965
AGRN	0.99965
AHSA1	0.99965
AHSA2	0.99965
AIMP1	0.99965
AIP	0.99965
AJ297365	0.99965
AK026502	0.99965
AK090973	0.99965
AK092150	0.99965
AK093256	0.99965
AK094342	0.99965
AK096314	0.99965
AK125676	0.99965
AK128153	0.99965
AK296947	0.99965
AK309744	0.99965
AK310146	0.99965
AK310794	0.99965
AKAP12	0.99965
AKAP13	0.99965
AKIP1	0.99965
AKR1A1	0.99965
ALAS1	0.99965
ALDH3A2	0.99965
ALDOA	0.99965
ALG1	0.99965
ALG6	0.99965
ALKBH7	0.99965
ALS2CR8	0.99965
ANG	0.99965
ANK2	0.99965
ANKRD12	0.99965
ANKRD24	0.99965
ANKRD32	0.99965
ANKRD49	0.99965
AP1AR	0.99965
AP2B1	0.99965
AP4E1	0.99965
AP5Z1	0.99965
APEH	0.99965
APEX1	0.99965
API5	0.99965
APOF	0.99965
ARF6	0.99965
ARHGAP11A	0.99965
ARHGAP26	0.99965
ARHGEF16	0.99965
ARHGEF40	0.99965
ARID3A	0.99965
ARIH2OS	0.99965
ARL2BP	0.99965
ARL2-SNX15	0.99965
ARL8B	0.99965
ARMC10	0.99965
ARMC2	0.99965
ARPC2	0.99965
ARPC4	0.99965
ARRB2	0.99965
AS3MT	0.99965
ASB1	0.99965
ASH1L-AS1	0.99965
ASNA1	0.99965
ASXL1	0.99965
ATAD5	0.99965
ATG16L2	0.99965
ATG4C	0.99965
ATL1	0.99965
ATP2B4	0.99965
ATP5G1	0.99965
ATP6V0C	0.99965
ATP6V0E1	0.99965
ATP6V1F	0.99965
ATP6V1G1	0.99965
ATRIP	0.99965
ATXN10	0.99965
AX747375	0.99965
AX747379	0.99965
AX747828	0.99965
AX748015	0.99965
AX748120	0.99965
AX748230	0.99965
AX748233	0.99965
AXL	0.99965
B3GALT5	0.99965
BAG2	0.99965
BAG4	0.99965
BANP	0.99965
BBS12	0.99965
BC009321	0.99965
BC018779	0.99965
BC020917	0.99965
BC024732	0.99965
BC028842	0.99965
BC033346	0.99965
BC033983	0.99965
BC034319	0.99965
BC035377	0.99965
BC039523	0.99965
BC041434	0.99965
BC042913	0.99965
BC045578	0.99965
BC045725	0.99965
BC046476	0.99965
BC052775	0.99965
BC068543	0.99965
BC073928	0.99965
BC080605	0.99965
BC132797	0.99965
BCAM	0.99965
BCAP29	0.99965
BCKDHB	0.99965
BCL2L13	0.99965
BCL2L2	0.99965
BCS1L	0.99965
BEND6	0.99965
BFAR	0.99965
BIRC6	0.99965
BLOC1S6	0.99965
BMPR1A	0.99965
BOLA1	0.99965
BRIX1	0.99965
BRPF1	0.99965
BSG	0.99965
BST2	0.99965
BTBD8	0.99965
BTF3	0.99965
C10orf131	0.99965
C10orf137	0.99965
C10orf32-AS3MT	0.99965
C11orf57	0.99965
C11orf82	0.99965
C12orf45	0.99965
C12orf5	0.99965
C12orf65	0.99965
C14orf159	0.99965
C16orf71	0.99965
C16orf72	0.99965
C17orf58	0.99965
C17orf59	0.99965
C18orf8	0.99965
C19orf24	0.99965
C19orf73	0.99965
C1orf220	0.99965
C1orf51	0.99965
C1orf53	0.99965
C2orf47	0.99965
C2orf49	0.99965
C2orf69	0.99965
C3orf38	0.99965
C4orf29	0.99965
C5orf30	0.99965
C5orf56	0.99965
C6orf120	0.99965
C6orf226	0.99965
C8orf42	0.99965
C9orf16	0.99965
CA13	0.99965
CA5BP1	0.99965
CAB39	0.99965
CACFD1	0.99965
CAD	0.99965
CANX	0.99965
CAP1	0.99965
CARM1	0.99965
CBFA2T2	0.99965
CBY1	0.99965
CCDC104	0.99965
CCDC106	0.99965
CCDC126	0.99965
CCDC130	0.99965
CCDC137	0.99965
CCDC142	0.99965
CCDC18	0.99965
CCDC22	0.99965
CCDC84	0.99965
CCDC9	0.99965
CCDC94	0.99965
CCDC97	0.99965
CCM2	0.99965
CCNB1	0.99965
CCNF	0.99965
CCNG1	0.99965
CCNT2	0.99965
CCT2	0.99965
CCT6A	0.99965
CCT6P1	0.99965
CD300A	0.99965
CD3EAP	0.99965
CD9	0.99965
CDC123	0.99965
CDC34	0.99965
CDC37L1	0.99965
CDC45	0.99965
CDC5L	0.99965
CDC73	0.99965
CDCA7	0.99965
CDHR2	0.99965
CDIPT-AS1	0.99965
CDK1	0.99965
CDK18	0.99965
CDK5RAP3	0.99965
CDK7	0.99965
CDK8	0.99965
CDK9	0.99965
CDKAL1	0.99965
CDKN2AIP	0.99965
CDT1	0.99965
CELSR3	0.99965
CENPA	0.99965
CENPN	0.99965
CENPQ	0.99965
CEP192	0.99965
CEP250	0.99965
CEP57L1	0.99965
CHAC1	0.99965
CHAF1A	0.99965
CHCHD1	0.99965
CHRAC1	0.99965
CHRNA5	0.99965
CHRNB1	0.99965
CHURC1	0.99965
CHURC1-FNTB	0.99965
CKS2	0.99965
CLDN4	0.99965
CLK2	0.99965
CLN8	0.99965
CLPP	0.99965
CMTM3	0.99965
CNFN	0.99965
CNN2	0.99965
CNNM3	0.99965
CNOT10	0.99965
CNOT8	0.99965
CNPY3	0.99965
CNTNAP1	0.99965
CNTROB	0.99965
COA6	0.99965
COG1	0.99965
COL26A1	0.99965
COL9A3	0.99965
COMMD3-BMI1	0.99965
COPS8	0.99965
COQ10B	0.99965
COX10	0.99965
COX5B	0.99965
CPB2	0.99965
CPB2-AS1	0.99965
CPT1C	0.99965
CREB3L4	0.99965
CRIM1	0.99965
CRISPLD1	0.99965
CRTAP	0.99965
CSTF3-AS1	0.99965
CTAGE5	0.99965
CTBP1-AS1	0.99965
CTC1	0.99965
CTDSPL2	0.99965
CTF1	0.99965
CTR9	0.99965
CTSL1	0.99965
CUL5	0.99965
CXADR	0.99965
CYBRD1	0.99965
CYP2S1	0.99965
CYP4V2	0.99965
CYR61	0.99965
D28390	0.99965
DAPK1	0.99965
DBF4	0.99965
DBF4B	0.99965
DCK	0.99965
DCPS	0.99965
DDA1	0.99965
DDB2	0.99965
DDI2	0.99965
DDX11	0.99965
DECR1	0.99965
DEGS1	0.99965
DGUOK	0.99965
DHX30	0.99965
DJ031142	0.99965
DKC1	0.99965
DL489931	0.99965
DL492700	0.99965
DLAT	0.99965
DLG1-AS1	0.99965
DLGAP1-AS1	0.99965
DLGAP4	0.99965
DM119512	0.99965
DMAP1	0.99965
DMRTA1	0.99965
DNAH14	0.99965
DNAJA3	0.99965
DNAJB2	0.99965
DNAJB4	0.99965
DNAJB9	0.99965
DNAJC27-AS1	0.99965
DNAJC3	0.99965
DNM2	0.99965
DOLPP1	0.99965
DPP3	0.99965
DPYSL2	0.99965
DQ574115	0.99965
DQ574505	0.99965
DQ582201	0.99965
DQ584698	0.99965
DQ587981	0.99965
DQ588877	0.99965
DRG1	0.99965
DTL	0.99965
DTWD1	0.99965
DTX3	0.99965
DTX3L	0.99965
DUSP19	0.99965
DUSP22	0.99965
DUT	0.99965
DYNC2H1	0.99965
DYNC2LI1	0.99965
DYNLL2	0.99965
DYRK3	0.99965
ECSIT	0.99965
EEPD1	0.99965
EFCAB13	0.99965
EFCAB5	0.99965
EGR1	0.99965
EIF2S3	0.99965
EIF3M	0.99965
EIF4B	0.99965
ELF3	0.99965
ELMOD3	0.99965
ELP2	0.99965
ELP4	0.99965
ENDOV	0.99965
ENO1-AS1	0.99965
ENO4	0.99965
ENPP3	0.99965
EPCAM	0.99965
ERCC6L2	0.99965
ERGIC1	0.99965
ESYT1	0.99965
ETAA1	0.99965
EVL	0.99965
EXO1	0.99965
EXOSC9	0.99965
FABP5	0.99965
FADD	0.99965
FAM102B	0.99965
FAM111B	0.99965
FAM118B	0.99965
FAM162A	0.99965
FAM173A	0.99965
FAM201A	0.99965
FAM206A	0.99965
FAM20B	0.99965
FAM213B	0.99965
FAM217B	0.99965
FAM221A	0.99965
FAM228B	0.99965
FAM64A	0.99965
FAM76A	0.99965
FAM8A1	0.99965
FANCD2	0.99965
FARP2	0.99965
FAS	0.99965
FAS-AS1	0.99965
FBXL7	0.99965
FBXO28	0.99965
FBXW8	0.99965
FDFT1	0.99965
FDPS	0.99965
FEM1B	0.99965
FGF2	0.99965
FGFR4	0.99965
FLAD1	0.99965
FLJ13224	0.99965
FLJ27352	0.99965
FNTA	0.99965
FPGS	0.99965
FRAT1	0.99965
FRG1	0.99965
FTSJD2	0.99965
FUK	0.99965
FUT8	0.99965
FZD3	0.99965
GALNT2	0.99965
GALNT7	0.99965
GANC	0.99965
GATAD2A	0.99965
GATC	0.99965
GCDH	0.99965
GDPD1	0.99965
GIGYF2	0.99965
GINM1	0.99965
GINS4	0.99965
GLCCI1	0.99965
GNG3	0.99965
GNL3L	0.99965
GNPAT	0.99965
GORAB	0.99965
[truncated: 26,454 more rows]
